# Supplementary material for: Association between the triglyceride-glucose index and contrast-induced nephropathy in chronic total occlusion patients undergoing percutaneous coronary intervention Running title: TyG index and Contrast-induced nephropathy
Source: Research Square preprint supplement (doi:10.21203/rs.3.rs-5421163/v1), 2024-12-18
Supplement: Supplementary file 1 [file 94229461e5eb7d97d58d3548.docx]

**Table 1: Baseline characteristics of the total population according to the groups**

| Variables | TyG index ≥8.65  (N=134) | TyG index <8.65  (N=84) | p value |
| --- | --- | --- | --- |
| Age years | 65.8±10.94 | 61.68±11.45 | **0.009** |
| Female gender, n (%) | 39 (29.1) | 20(23.8) | 0.392 |
| Ejection fraction (IQR) | 50 (20) | 50 (20) | 0.223 |
| Hypertension, n (%) | 48 (35.8) | 30 (35.7) | 0.987 |
| Diabetes mellitus, n (%) | 60 (44.8) | 11 (13.1) | **<0.001** |
| Dislipidemia, n (%) | 52 (38.8) | 21 (25) | **0.036** |
| Smoking, n (%) | 37 (27.6) | 21 (25) | 0.671 |
| Chronic kidney disease, n (%) | 31 (23.1) | 18 (21.4) | 0.769 |
| Cerebrovascular disease, n (%) | 6(4.5) | 0 (0) | **0.049** |
| Peripheral arterial disease, n (%) | 7 (5.2) | 5 (6) | 0.818 |
| Instent restenosis, n (%) | 22 (16.4) | 6 (7.1) | **0.046** |
| Two or more total vessel, n (%) | 18 (13.4) | 4 (4.8) | **0.039** |
| Hemoglobin, gr/dL | 13.8±1.8 | 13.3±1.9 | **0.022** |
| White blood cell, 103/μL | 10.0±3.5 | 9.6±3.5 | 0.540 |
| Neutrophile, 109/L (IQR) | 5.81 (4.2) | 5.26 (2.7) | 0.136 |
| Lymphocyte, 109/L (IQR) | 2.15 (1.1) | 1.97(1.07) | 0.165 |
| Platelet, 103/μL | 246±71.6 | 247.3±79.8 | 0.902 |
| Glucose, mg/dL (IQR) | 144 (122) | 103 (29) | **<0.001** |
| Creatinine, mg/dL (IQR) | 0.89 (0.3) | 0.88 (0.31) | 0.458 |
| Glomerular filtration rate, mL/min | 80.88±23.3 | 82.13±26.95 | 0.717 |
| Albumin, mg/dL | 3.6±0.44 | 3.56±0.47 | 0.465 |
| Total cholesterol, mg/dL | 188.8±9.6 | 168.4±44.6 | **0.002** |
| HDL, mg/dL | 37.9±7.9 | 42.5±13.1 | 0.002 |
| LDL, mg/dL | 108.2±37.1 | 102.9±38.3 | 0.316 |
| Triglyceride, mg/dL (IQR) | 193 (106) | 98 (49.25) | **<0.001** |
| Uric acid,mg/dL | 6.2±1.85 | 5.61±1.88 | **0.044** |

TyG index: Triglyceride-glucose index, HDL: High density lipoprotein, LDL: Low density lipoprotein

**Table 2: Pearson correlation tests with TyG index**

| **Parameters** | **Correlation coefficient** | **p value** |
| --- | --- | --- |
| White blood cell | 0.219 | **0.001** |
| Hemoglobine | 0.108 | 0.113 |
| Ejection fraction | 0.039 | 0.565 |
| Glomerular filtration rate | -0.092 | 0.174 |
| Glucose | 0.587 | **<0.001** |
| Trigliceride | 0.514 | **<0.001** |
| Total cholesterol | 0.261 | **<0.001** |
| Low density lipoprotein | 0.048 | 0.483 |

**Table 3: Logistic regression analysis of development of contrast-induced nephropathy**

| **Parameters** | **Univariable analysis** | | **Multivariable analysis** | |
| --- | --- | --- | --- | --- |
| **OR (95%CI)** | **p value** | **OR (95%CI)** | **p value** |
| Age | 1.04 (1.01-1.07) | **0.007** | 1.04 (1.01-1.08) | **0.020** |
| Female gender | 0.87 (0.41-1.87) | 0.730 |  |  |
| Hypertension | 1.66 (0.85-3.26) | 0.136 |  |  |
| Diabetes mellitus | 0.63 (0.32-1.25) | 0.188 |  |  |
| Cerebrovascular disease | 0.24 (0.47-.1.23) | 0.087 | 1.87 (0.24-14.58) | 0.549 |
| Chronic kidney disease | 3.64 (1.78-7.45) | **<0.001** | 2.34 (1.02-5.33) | **0.044** |
| Dyslipimia | 0.75 (0.38-1.49) | 0.419 |  |  |
| Peripheral arterial disease | 4.42 (1.35-14.46) | **0.014** | 5.66 (1.24-25.91) | **0.026** |
| Smoking | 1.79 (0.88-3.63) | 0.104 |  |  |
| Ejection fraction | 0.95 (0.92-0.98) | **0.001** | 0.95 (0.92-0.99) | **0.005** |
| Glucose | 1.00 (0.99-1.00) | 0.176 |  |  |
| Total cholesterol | 1.00 (1.00-1.01) | 0.257 |  |  |
| Hemoglobine | 0.94 (0.78-1.12) | 0.483 |  |  |
| Two or more total vessel | 3.19 (1.26-8.03) | **0.014** | 1.71 (0.57-5.12) | 0.342 |
| TyG index | 1.91 (1.21-3.04) | **0.006** | 2.17 (1.21-3.89) | **0.009** |
| LDL cholesterol | 1.10 (1.00-1.01) | **0.028** | 1.00 (1.00-1.02) | **0.024** |
